# Supplementary material
Source: Springer Nature journal article supplement (https://www.springermedizin.de/resource/supplementary/12865_2003_42_MOESM5_ESM.pdf/9428434)

# Hearts

Host FVB

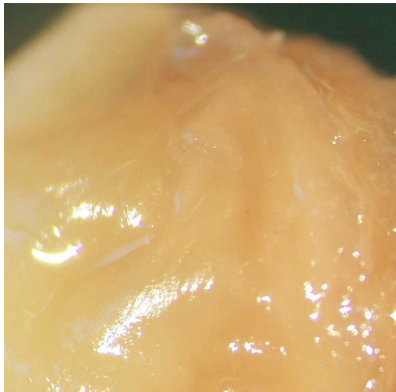

Donor VWF-lacZ

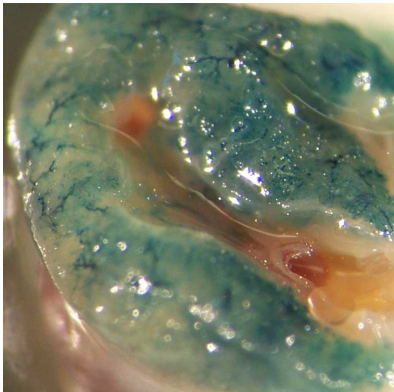

Supplement: MOESM5 [file 9428434]
